# Supplementary material for: Comparative Evaluation of MaxQuant and Proteome Discoverer MS1-Based Protein Quantification Tools
Source: J Proteome Res. 2021 May 26;20(7):3497–507. doi: 10.1021/acs.jproteome.1c00143 (PMC8280745; doi:10.1021/acs.jproteome.1c00143)
Supplement: Supplementary file 6 — pr1c00143_si_006.xlsx [file pr1c00143_si_006.xlsx]

## Sheet: Dataset_S5
Number of proteins identified and/or quantified in each replicate and in each sample (average and cumulative values) of the main dataset (PXD001819) using the quantification approaches analyzed in this study.
		MQ-I						MQ-L						PD
		All		Background		Spike		All		Background		Spike		All		Background		Spike
		Identified	Quantified	Identified	Quantified	Identified	Quantified	Identified	Quantified	Identified	Quantified	Identified	Quantified	Identified	Quantified	Identified	Quantified	Identified	Quantified
Sample P1	Replicate 1	772	999	724	951	48	48	772	984	724	936	48	48	842	1213	794	1165	48	48
	Replicate 2	768	1000	720	952	48	48	768	986	720	938	48	48	824	1212	776	1164	48	48
	Replicate 3	766	997	718	949	48	48	766	983	718	935	48	48	854	1211	806	1163	48	48
	Average	768.667	998.667	720.667	950.667	48	48	768.667	984.333	720.667	936.333	48	48	840	1212	792	1164	48	48
	Cumulative	856	1024	808	976	48	48	856	1014	808	966	48	48	940	1240	892	1192	48	48
Sample P2	Replicate 1	793	1004	746	956	47	48	793	990	746	942	47	48	886	1211	838	1163	48	48
	Replicate 2	765	1000	717	952	48	48	765	987	717	939	48	48	846	1197	798	1149	48	48
	Replicate 3	775	1005	729	957	46	48	775	992	729	944	46	48	849	1214	801	1166	48	48
	Average	777.667	1003	730.667	955	47	48	777.667	989.667	730.667	941.667	47	48	860.333	1207.33	812.333	1159.33	48	48
	Cumulative	880	1033	832	985	48	48	880	1021	832	973	48	48	986	1237	938	1189	48	48
Sample P3	Replicate 1	790	1014	747	966	43	48	790	1001	747	953	43	48	871	1221	826	1173	45	48
	Replicate 2	785	1007	741	959	44	48	785	995	741	947	44	48	866	1219	820	1171	46	48
	Replicate 3	801	1003	757	955	44	48	801	991	757	943	44	48	872	1221	827	1173	45	48
	Average	792	1008	748.333	960	43.6667	48	792	995.667	748.333	947.667	43.6667	48	869.667	1220.33	824.333	1172.33	45.3333	48
	Cumulative	878	1033	833	985	45	48	878	1022	833	974	45	48	983	1247	936	1199	47	48
Sample P4	Replicate 1	772	1012	747	965	25	47	772	999	747	952	25	47	861	1216	833	1168	28	48
	Replicate 2	759	1004	730	957	29	47	759	989	730	943	29	46	842	1214	807	1166	35	48
	Replicate 3	772	1002	744	957	28	45	772	991	744	946	28	45	860	1219	827	1171	33	48
	Average	767.667	1006	740.333	959.667	27.3333	46.3333	767.667	993	740.333	947	27.3333	46	854.333	1216.33	822.333	1168.33	32	48
	Cumulative	859	1035	827	987	32	48	859	1025	827	977	32	48	957	1241	920	1193	37	48
Sample P5	Replicate 1	741	1001	732	959	9	42	741	988	732	946	9	42	813	1202	800	1154	13	48
	Replicate 2	762	1004	754	964	8	40	762	990	754	950	8	40	846	1217	834	1170	12	47
	Replicate 3	755	1006	748	964	7	42	755	992	748	950	7	42	847	1226	837	1178	10	48
	Average	752.667	1003.67	744.667	962.333	8	41.3333	752.667	990	744.667	948.667	8	41.3333	835.333	1215	823.667	1167.33	11.6667	47.6667
	Cumulative	853	1037	841	991	12	46	853	1024	841	978	12	46	954	1245	938	1197	16	48
Sample P6	Replicate 1	738	979	737	963	1	16	738	969	737	953	1	16	815	1211	814	1171	1	40
	Replicate 2	744	977	743	960	1	17	744	968	743	951	1	17	832	1215	831	1176	1	39
	Replicate 3	729	984	727	966	2	18	729	974	727	956	2	18	811	1213	810	1177	1	36
	Average	737	980	735.667	963	1.33333	17	737	970.333	735.667	953.333	1.33333	17	819.333	1213	818.333	1174.67	1	38.3333
	Cumulative	828	1016	826	988	2	28	828	1009	826	981	2	28	928	1241	926	1197	2	44
Sample P7	Replicate 1	749	982	748	965	1	17	749	974	748	957	1	17	828	1217	827	1179	1	38
	Replicate 2	765	985	763	968	2	17	765	971	763	954	2	17	853	1213	852	1178	1	35
	Replicate 3	763	973	763	957	0	16	763	963	763	947	0	16	844	1216	843	1181	1	35
	Average	759	980	758	963.333	1	16.6667	759	969.333	758	952.667	1	16.6667	841.667	1215.33	840.667	1179.33	1	36
	Cumulative	850	1017	848	990	2	27	850	1009	848	982	2	27	958	1241	956	1200	2	41
Sample P8	Replicate 1	769	971	769	956	0	15	769	962	769	947	0	15	853	1206	853	1174	0	32
	Replicate 2	772	983	772	965	0	18	772	977	772	959	0	18	850	1200	850	1165	0	35
	Replicate 3	773	981	772	964	1	17	773	971	772	955	1	16	863	1213	863	1181	0	32
	Average	771.333	978.333	771	961.667	0.333333	16.6667	771.333	970	771	953.667	0.333333	16.3333	855.333	1206.33	855.333	1173.33	0	33
	Cumulative	861	1015	860	989	1	26	861	1007	860	982	1	25	970	1235	969	1197	1	38
Sample P9	Replicate 1	827	985	827	970	0	15	827	974	827	959	0	15	903	1205	903	1175	0	30
	Replicate 2	809	985	808	968	1	17	809	978	808	962	1	16	883	1209	883	1173	0	36
	Replicate 3	782	985	781	969	1	16	782	979	781	965	1	14	853	1205	853	1172	0	33
	Average	806	985	805.333	969	0.666667	16	806	977	805.333	962	0.666667	15	879.667	1206.33	879.667	1173.33	0	33
	Cumulative	910	1017	909	987	1	30	910	1013	909	985	1	28	1014	1232	1013	1193	1	39
